# Supplementary material for: Microbial community diversity and potential functionality in response to dam construction along the Three Gorge Reservoir, China
Source: Front Microbiol. 2023 Sep 20;14:1218806. doi: 10.3389/fmicb.2023.1218806 (PMC10547884; doi:10.3389/fmicb.2023.1218806)
Supplement: Supplementary file 2 [file Table_2.xlsx]

## Sheet: Sheet1
Table S2. The statistics of obtained sequences data of 16S rRNA gene amplicon sequencing in the present study
Sample ID	Raw_Tags	Raw_Bases	Valid_Tags	Valid_Bases	Valid%	Q20%	Q30%	GC%
EQND_1	87436	43.72M	65857	27.59M	75.32	95.81	88.59	55.62
EQND_2	85514	42.76M	65201	27.32M	76.25	94.7	86	55.74
EQND_3	80113	40.06M	59668	25.00M	74.48	97.82	93.3	55.54
BJND_1	80283	40.14M	62980	26.40M	78.45	97.73	93.15	55.71
BJND_2	84225	42.11M	78013	32.69M	92.62	97.78	93.33	55.23
BJND_3	82769	41.38M	67107	28.14M	81.08	97.63	92.96	55.63
QJND_1	80627	40.31M	67017	28.12M	83.12	97.69	93.1	55.83
QJND_2	86827	43.41M	72997	30.63M	84.07	97.6	93.01	55.75
QJND_3	87639	43.82M	73736	30.96M	84.14	96.52	90.26	55.85
SWND_1	85397	42.70M	68453	28.69M	80.16	96.98	91.21	55.71
SWND_2	80564	40.28M	63028	26.39M	78.23	97.99	93.79	55.44
SWND_3	85832	42.92M	66897	28.07M	77.94	97.1	91.33	55.55
TKND_1	86741	43.37M	70098	29.39M	80.81	97.8	93.31	55.59
TKND_2	86467	43.23M	71320	29.91M	82.48	97.8	93.36	55.36
TKND_3	86677	43.34M	74319	31.10M	85.74	97.86	93.53	55.79
XTND_1	85127	42.56M	68807	28.87M	80.83	97.73	93.31	55.42
XTND_2	87587	43.79M	71364	29.91M	81.48	95.3	87.61	55.68
XTND_3	86178	43.09M	67898	28.51M	78.79	96.45	89.86	55.54
EQNG_1	82221	41.11M	70362	29.48M	85.58	95.15	87.12	56.97
EQNG_2	82901	41.45M	74918	31.38M	90.37	97.01	91.43	56.85
EQNG_3	82514	41.26M	73409	30.75M	88.97	96.85	91.19	56.79
BJNG_1	83323	41.66M	72393	30.32M	86.88	96.42	90.27	56.44
BJNG_2	87240	43.62M	80091	33.54M	91.81	96.27	89.63	56.53
BJNG_3	85461	42.73M	73281	30.72M	85.75	96.77	91.07	56.33
QJNG_1	84114	42.06M	75432	31.59M	89.68	96.84	91.2	56.43
QJNG_2	100258	50.13M	86901	36.39M	86.68	89.99	77.49	56.82
QJNG_3	81475	40.74M	68213	28.59M	83.72	95.05	87	56.44
SWNG_1	86039	43.02M	75278	31.51M	87.49	96.8	91.08	56.15
SWNG_2	82667	41.33M	69014	28.89M	83.48	96.59	90.61	56.23
SWNG_3	83288	41.64M	71336	29.89M	85.65	95.77	88.77	56.21
TKNG_1	84430	42.22M	72483	30.39M	85.85	95.99	89	55.97
TKNG_2	81942	40.97M	70197	29.42M	85.67	96.54	90.61	56.01
TKNG_3	86341	43.17M	67911	28.45M	78.65	96.77	91.06	56.22
XTNG_1	80359	40.18M	58584	24.57M	72.9	91.68	80.21	56.66
XTNG_2	82223	41.11M	72021	30.18M	87.59	95.25	87.41	56.28
XTNG_3	84924	42.46M	74421	31.19M	87.63	95.92	88.91	56.29
EQTD1_1	80952	40.48M	65644	27.62M	81.09	97.95	93.74	56.97
EQTD1_2	85012	42.51M	69610	29.26M	81.88	97.71	93.03	56.44
EQTD1_3	86439	43.22M	71325	30.00M	82.51	97.74	93.24	56.8
BJTD1_1	80965	40.48M	70324	29.55M	86.86	96.73	90.72	56.5
BJTD1_2	85706	42.85M	72222	30.38M	84.27	96.88	90.91	56.7
BJTD1_3	84960	42.48M	66412	27.87M	78.17	97.85	93.5	56.82
QJTD1_1	83770	41.88M	69568	29.17M	83.05	97.68	93.09	56.96
QJTD1_2	80043	40.02M	67542	28.37M	84.38	97.73	93.4	57.03
QJTD1_3	83469	41.73M	72543	30.48M	86.91	96.42	90.01	57.04
SWTD1_1	87664	43.83M	75681	31.71M	86.33	97.81	93.49	57.17
SWTD1_2	86300	43.15M	74718	31.27M	86.58	97.98	93.91	57.19
SWTD1_3	83474	41.74M	72690	30.41M	87.08	97.89	93.67	57.77
TKTD1_1	85099	42.55M	67270	28.22M	79.05	97.92	93.66	57.12
TKTD1_2	80330	40.16M	64981	27.24M	80.89	97.82	93.37	57.28
TKTD1_3	86112	43.06M	72605	30.46M	84.31	97.77	93.29	57.1
XTTD1_1	81171	40.59M	69820	29.26M	86.02	96.71	90.65	58.04
XTTD1_2	85731	42.87M	71838	30.09M	83.79	97.2	91.68	58.02
XTTD1_3	87825	43.91M	69694	29.15M	79.36	97.96	93.84	57.39
EQTD2_1	80302	40.15M	66831	28.11M	83.22	97.77	93.21	56.76
EQTD2_2	80563	40.28M	67983	28.58M	84.38	97.53	92.65	56.51
EQTD2_3	84521	42.26M	70693	29.69M	83.64	97.69	93.25	56.16
BJTD2_1	80143	40.07M	65014	27.28M	81.12	97.62	92.8	57.1
BJTD2_2	83861	41.93M	71951	30.20M	85.8	97.73	93.28	57.54
BJTD2_3	83143	41.57M	70077	29.41M	84.28	97.6	92.79	57.21
QJTD2_1	86497	43.25M	71913	30.09M	83.14	96.43	89.9	56.97
QJTD2_2	86262	43.13M	69191	28.92M	80.21	98.02	93.99	56.86
QJTD2_3	87033	43.52M	70599	29.54M	81.12	97.56	92.64	57.12
SWTD2_1	81633	40.82M	69864	29.38M	85.58	97.69	93.35	57.9
SWTD2_2	82804	41.40M	72291	30.39M	87.3	96.11	89.33	58.06
SWTD2_3	80614	40.31M	68629	28.84M	85.13	97.01	91.27	57.97
TKTD2_1	83035	41.52M	71949	30.25M	86.65	97.89	93.59	56.67
TKTD2_2	86902	43.45M	73188	30.76M	84.22	95.34	87.47	57.08
TKTD2_3	83650	41.83M	72355	30.43M	86.5	97.54	92.9	56.9
XTTD2_1	80103	40.05M	66363	27.86M	82.85	97.91	93.65	56.7
XTTD2_2	86033	43.02M	70164	29.40M	81.55	97.76	93.17	57.09
XTTD2_3	83730	41.87M	74623	31.33M	89.12	97.89	93.61	56.79
SWTG_1	83791	41.90M	78869	32.90M	94.13	96.71	90.46	56.23
SWTG_2	81497	40.75M	75757	31.63M	92.96	97.75	93.17	55.87
SWTG_3	87674	43.84M	79697	33.07M	90.9	97.72	93.26	55.78
XTTG_3	84778	42.39M	70579	29.68M	83.25	97.46	92.78	58.24
EQTG_1	83103	41.55M	77395	32.17M	93.13	96.61	90.56	57.95
EQTG_2	81224	40.61M	72718	30.38M	89.53	96.45	90.21	57.66
EQTG_3	86938	43.47M	79322	33.15M	91.24	96.04	89.11	56.04
BJTG_1	80775	40.39M	68111	28.34M	84.32	96.86	91.12	57.81
BJTG_2	80379	40.19M	67878	28.26M	84.45	97.02	91.5	57.69
BJTG_3	82530	41.27M	60012	24.91M	72.72	91.98	80.6	58.32
QJTG_1	85863	42.93M	72166	30.09M	84.05	94.57	85.84	58.07
QJTG_2	82444	41.22M	69531	28.93M	84.34	96.39	89.79	57.93
QJTG_3	86594	43.30M	74293	30.92M	85.79	96.74	90.92	58
TKTG_1	84571	42.29M	73230	30.75M	86.59	96.89	91.28	57.62
TKTG_2	86131	43.07M	68760	28.88M	79.83	92.63	81.8	58.41
TKTG_3	82210	41.10M	73981	31.04M	89.99	97.09	91.6	56.75
XTTG_1	81828	40.91M	73466	30.84M	89.78	96.83	91.1	57.46
XTTG_2	86680	43.34M	75707	31.80M	87.34	96.44	90.29	57.95
